# Supplementary material for: Cyst-Wall-Protein-1 is fundamental for Golgi-like organelle neogenesis and cyst-wall biosynthesis in Giardia lamblia
Source: PubMed Central journal article supplement (PMC5171811; doi:10.1038/ncomms13859), 2016-12-15
Supplement: ncomms13859-s1.pdf [file ncomms13859-s1.pdf]

Supplementary figure 1

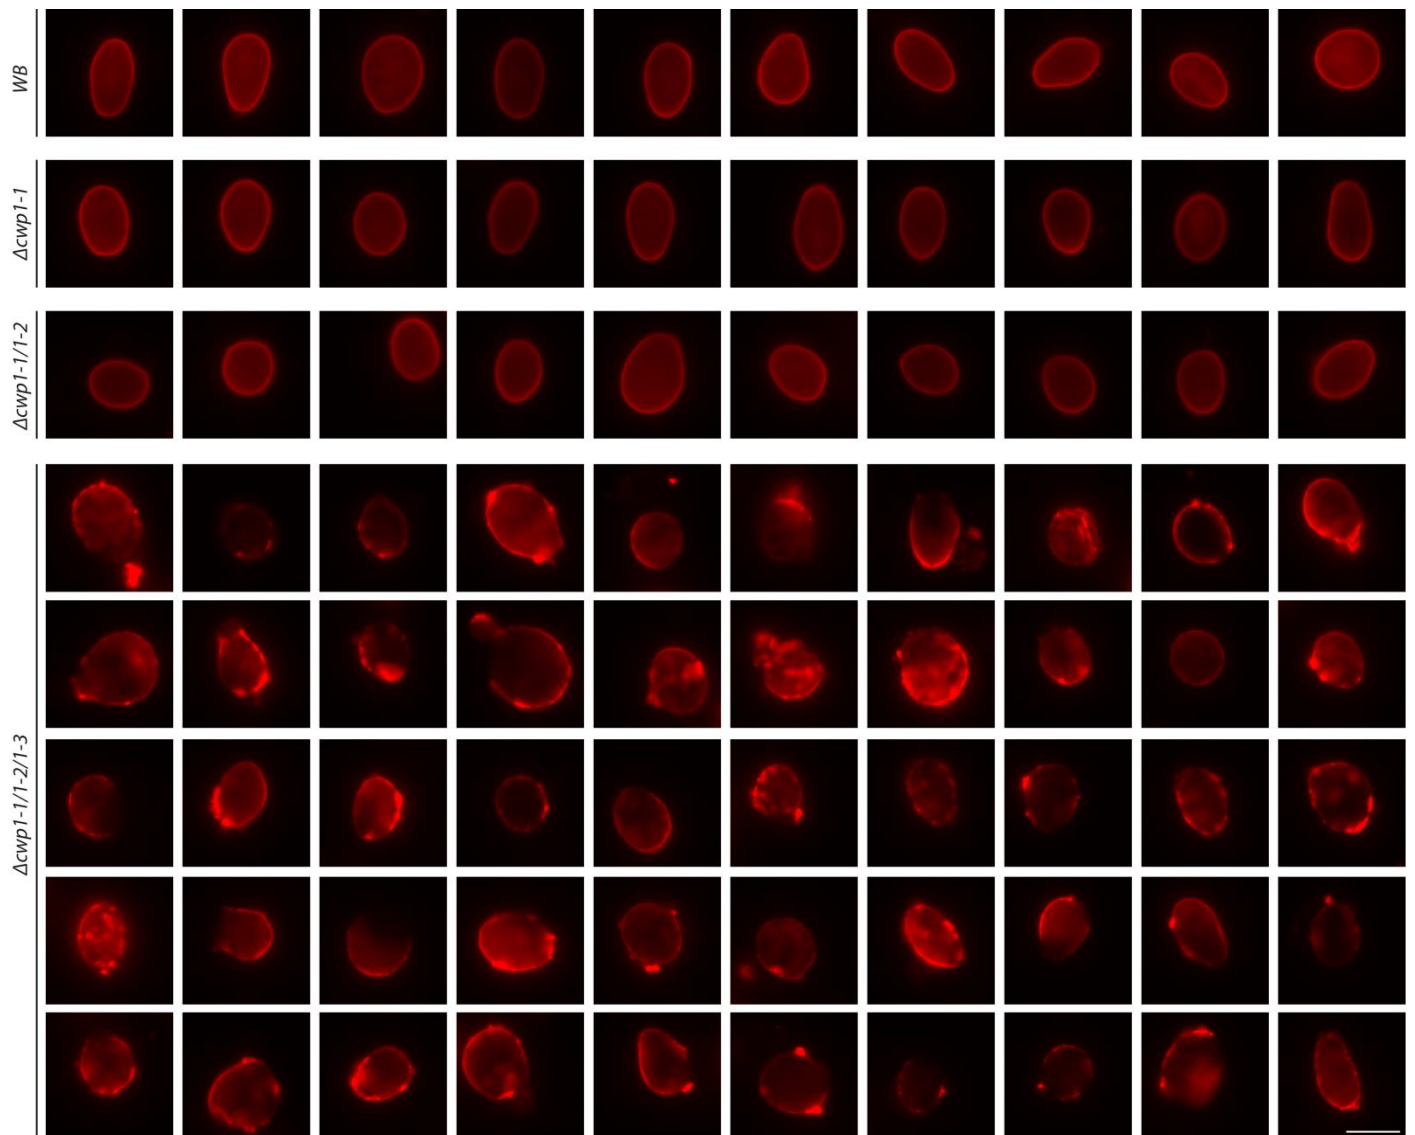

Supplementary Figure 1.

*Cysts depleted of three out of four alleles present abnormal CWP1 deposition and distribution*

Immunofluorescence analysis of wildtype (WB) cysts and cysts depleted of either 1 ( $\Delta cwp1-1$ ), 2 ( $\Delta cwp1-1/1-2$ ) or 3 ( $\Delta cwp1-1/1-2/1-3$ ) CWP1 alleles out of 4 highlights gross aberrations in the subcellular distribution of CWP1 only in  $\Delta cwp1-1/1-2/1-3$  cysts. Scale bar: 10  $\mu$ m.

## Supplementary Figure 2

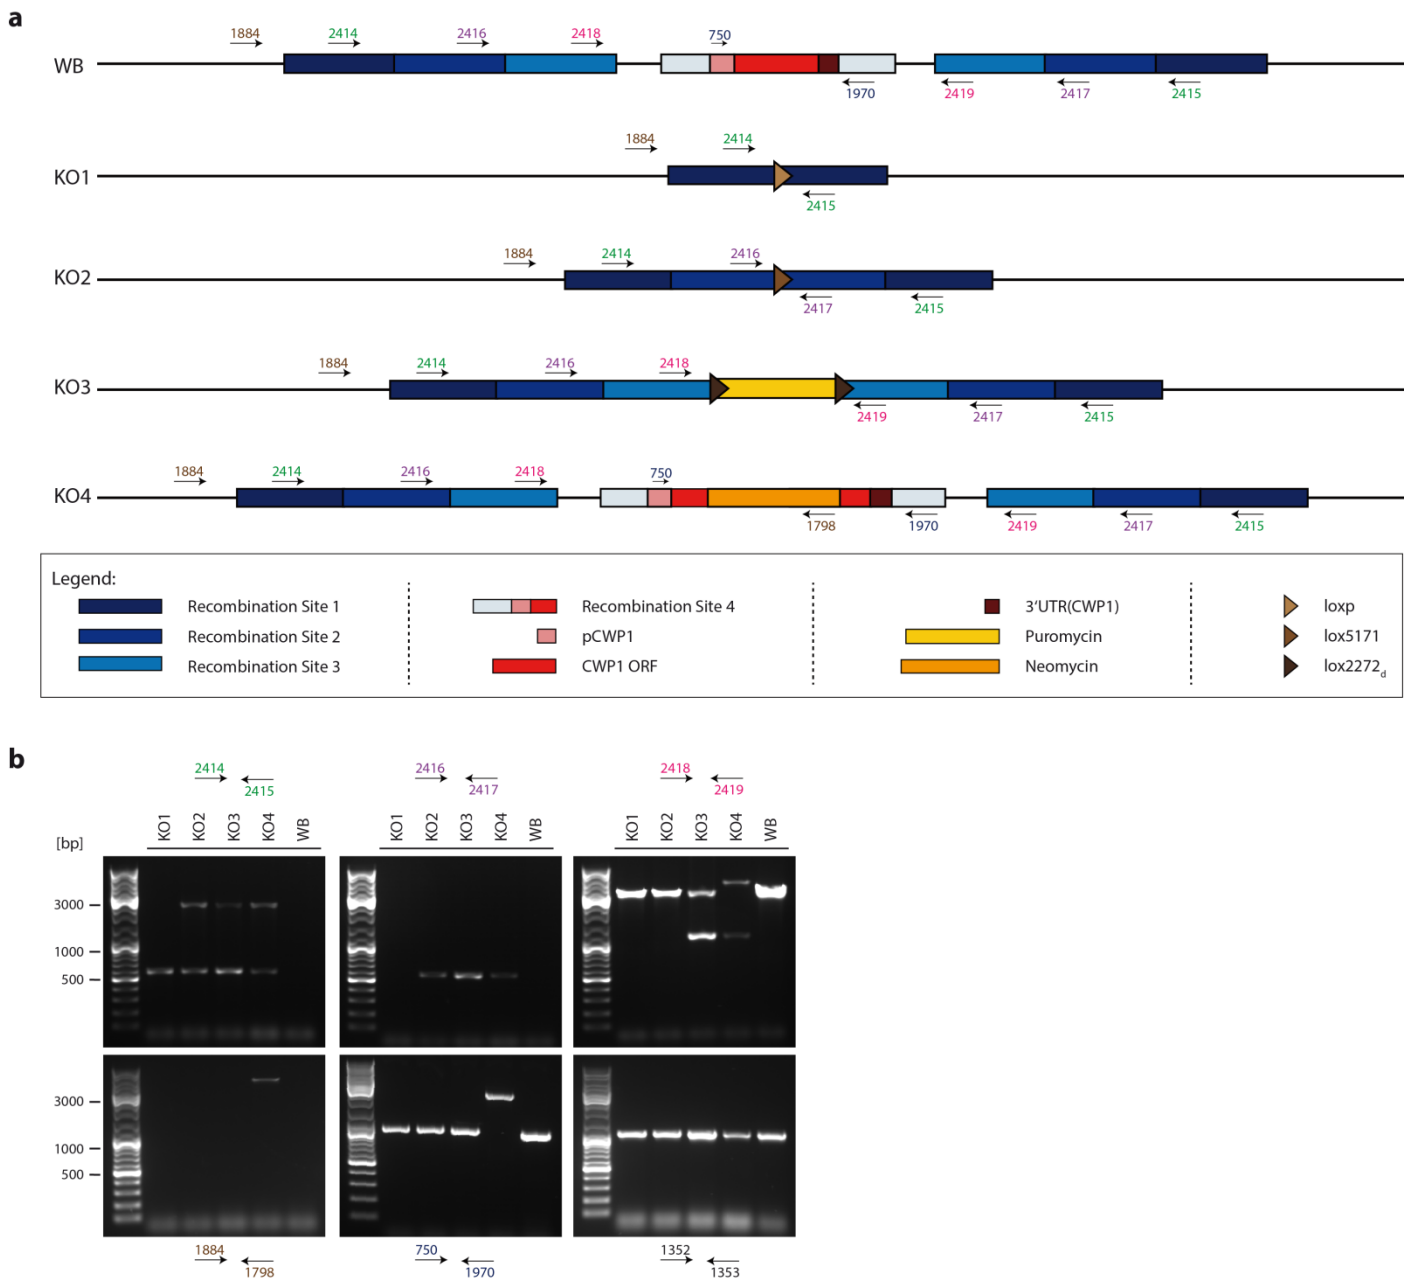

### Supplementary Figure 2.

#### *PCR analysis of genomic DNA to monitor sequential loss of intact CWP1 loci*

(a) The upper scheme illustrates the status of the *CWP1* locus in WB-C6 cells and in progressively knocked-out lines (KO1 to KO4). (b) Genomic DNA from each line was extracted and analysed by PCR using oligonucleotide pairs with matching colors to produce unique DNA fragments. Amplification of a control locus (GGD gene model G150803\_17161) was performed with oligonucleotides 1352 and 1353 (refer to Supplementary Table 1 for sequences). Marker lanes are labelled for main size bands (in bp).

## Supplementary Figure 3

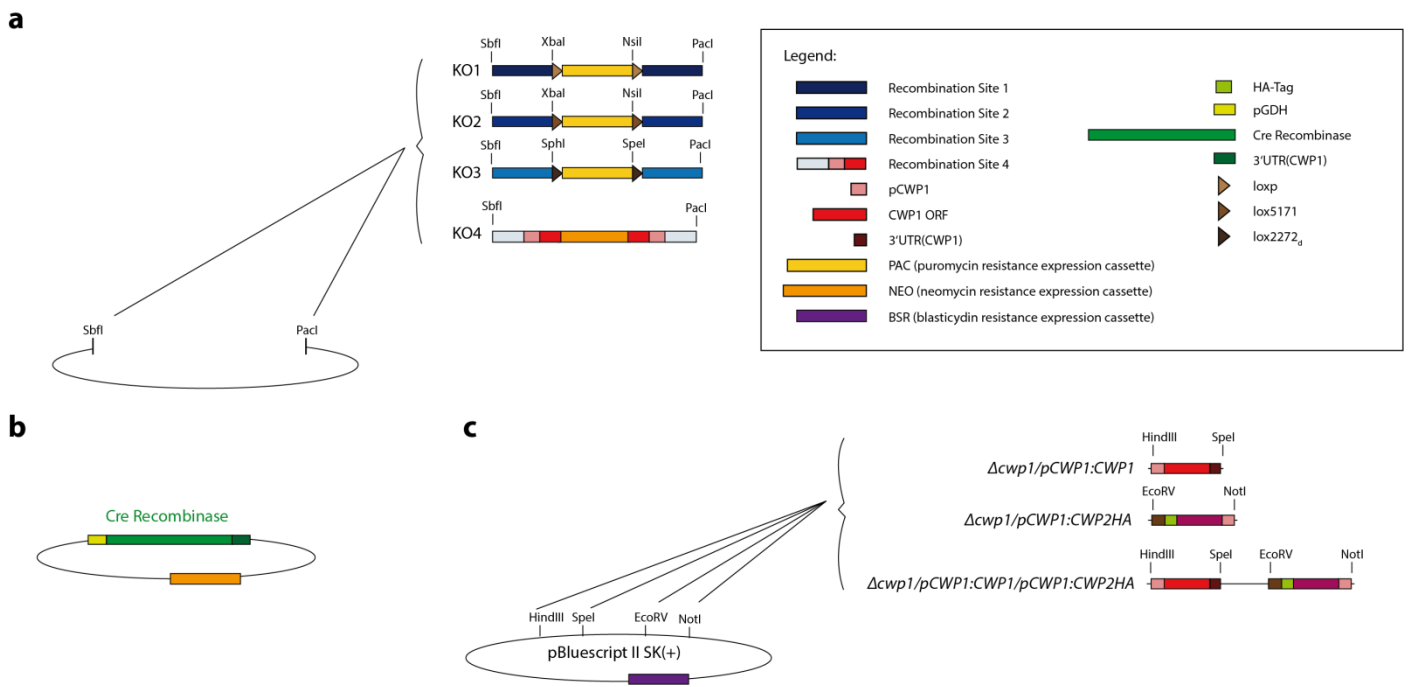

## Supplementary Figure 3.

### Overview of plasmids constructed for the generation and complementation testing of line $\Delta cwp1$

(a) Plasmids CWP1KO1 to CWP1KO4, each harbouring a “floxed” puromycin resistance expression cassette (PAC) and 1000bp-long recombination sites homologous to DNA regions surrounding the genomic *CWP1* allele. Enzyme restriction sites used for engineering of the plasmids are indicated. (b) Plasmid encoding for constitutively-expressed Cre recombinase carrying a neomycin resistance expression cassette (NEO). (c) Plasmids coding for blasticidin resistance for expression of CWP1 and of an HA-tagged CWP2 reporter to monitor encystation in the absence of CWP1.

## Supplementary Figure 4

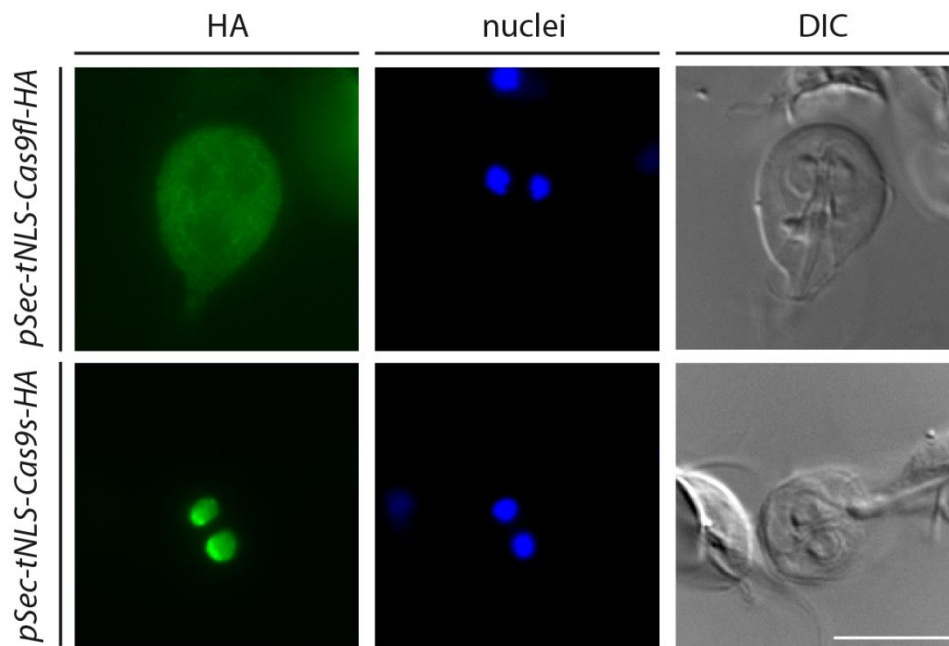

### Supplementary Fig 4.

#### *A truncated variant of S. pyogenes Cas9 can be targeted to the G. lamblia nucleus*

Full length (*ca.*4250 bp) nuclear-targeted *S. pyogenes* Cas9 accumulates in the cytosol of transgenic *G. lamblia* cells (line pSec-tNLS-Cas9fl-HA). However, a similarly nuclear-targeted *ca.*1000bp truncated Cas9 variant is correctly deposited in the nuclei of expressing cells (line pSec-tNLS-Cas9s-HA). Scale bar: 10  $\mu$ m.

## Supplementary Figure 5

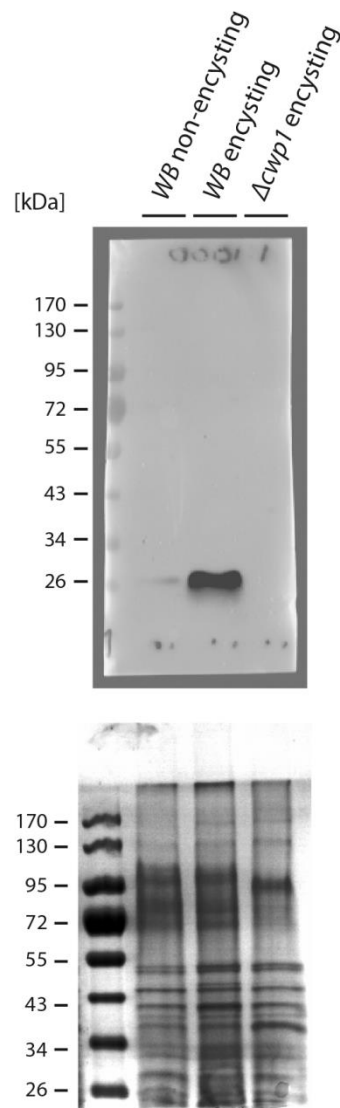

### Supplementary Fig 5.

#### *Immunoblot analysis of line $\Delta cwp1$*

Uncropped, full view of the immunoblot and the Coomassie-stained protein gel shown in main figure 1d. A strong signal for CWP1 is visible in extracts derived from encysting WB cells, whereas no signal is obtained with  $\Delta cwp1$ -derived material. Marker lanes are labelled for main size bands (in kDa).

## Supplementary Table 1

### *Oligonucleotides used for construct synthesis, genomic DNA, 3' RACE and RT-PCR analysis*

| Oligonucleotide number | Oligonucleotide name | Sequence 5'-3'                                                                                                                        | Application                                                                                                                          |
|------------------------|----------------------|---------------------------------------------------------------------------------------------------------------------------------------|--------------------------------------------------------------------------------------------------------------------------------------|
| 750                    | CWP-s-NheI           | ATGCTA GCCTAGCCACGCATGGGCTGT                                                                                                          | amplification of allele <i>cwp1-4</i> from genomic DNA                                                                               |
| 1040                   | k-adaptor            | CCGGAATTCGGTACCTCTAGA                                                                                                                 | 3' RACE: amplification step                                                                                                          |
| 1045                   | k-anchorV            | CCGGAATTCGGTACCTCTAGA(T18)V                                                                                                           | 3' RACE: reverse-transcription step                                                                                                  |
| 1080                   | CWP11SpeI            | CGACTAGTATGATGCTCGCTCTCCTTG                                                                                                           | RT-PCR: amplification step for <i>cwp1</i>                                                                                           |
| 1352                   | Tom40_Spe_for        | gc ACTAGT ATGCCCTTTCCTGGTCT                                                                                                           | amplification of a control locus from genomic DNA and amplification step for GGD gene model G150803_17161 ( <i>tom40</i> ) in RT-PCR |
| 1353                   | Tom40_SbfI_rev       | gc CCTGCAGG GC CTTGTGATTGCTCGAAGA                                                                                                     | amplification of a control locus (GGD gene model G150803_17161 ; <i>tom40</i> ) from genomic DNA                                     |
| 1849                   | GDH5'UTR Xba for     | GC TCT AGA GAA GCG CTG ACC ACA AAT AAC GC                                                                                             | cloning of the promoter and 5'UTR of giardial <i>GDH</i>                                                                             |
| 1850                   | GDH5'UTR Nsi rev     | CG ATGCAT GGA TTT TAA AAT CTG GGG CGC C                                                                                               | cloning of the promoter and 5'UTR of giardial <i>GDH</i>                                                                             |
| 1865                   | CWP1KO1Sbf for 1     | GC CCTGCAGG TTG ACG GAG ATA GGG GAC TGC TC                                                                                            | cloning of fragment RS1 for construct CWP1KO1                                                                                        |
| 1866                   | CWP1KO1Xbarev 1      | CG TCTAGA TTA TCC CTG CGG AAG AAA TTC AAC TAT GAT                                                                                     | cloning of fragment RS1 for construct CWP1KO1                                                                                        |
| 1867                   | CWP1KO1Xbafor 2      | GC TCTAGA <u>ATAACTTCGTATAATGTATGCTATACGAAGTTAT</u><br>GAAGCGCTGACCACAAATAAC                                                          | cloning of "floxed" <i>PAC</i> cassette for construct CWP1KO1 (loxP site is underlined)                                              |
| 1868                   | Puro3'UTR Nsi rev    | CG ATGCAT G AAT TCG AGC TCG GTA CCA G<br>GC ATGCAT <u>ATAACTTCGTATAATGTATGCTATACGAAGTTAT</u><br>ATGCACGATAGTACGCTCACTAGAGG            | cloning of "floxed" <i>PAC</i> cassette for construct CWP KO1                                                                        |
| 1869                   | CWP1KO1Nsi for 4     | GC TCTAGA TTA TCC CTG CGG AAG AAA TTC AAC TAT GAT                                                                                     | cloning of fragment RS1' for construct CWP1KO1 (loxP site is underlined)                                                             |
| 1872                   | CWP1KO1Pac rev 4     | GC TTAATTA TCC ATC AGC TCT ATT ATA TTA CCT GAA CG                                                                                     | cloning of fragment RS1' for construct CWP1KO1                                                                                       |
| 1873                   | CWP1KO2 sbf for      | GC CCTGCAGG GCCATTCCTGCCTCCACA                                                                                                        | cloning of fragment RS2 for construct CWP1KO2                                                                                        |
| 1874                   | CWP1KO2 xba rev      | CG TCTAGA C CAT TGT GAC GTT GAA CCG AAA AG<br>GC TCTAGA <u>ATAACTTCGTATAATGTGTA</u> CTACTATACGAAGTTAT<br>GAAGCGCTGACCACAAATAAC        | cloning of fragment RS2 for construct CWP1KO2                                                                                        |
| 1875                   | CWP1KO2 Xba for      | GC ATGCAT <u>ATAACTTCGTATAATGTGTA</u> CTACTATACGAAGTTAT<br>GTTTCATGCCAAAAACGGGAAAAA                                                   | cloning of "floxed" <i>PAC</i> cassette for construct CWP1KO2 (lox5171 site is underlined)                                           |
| 1876                   | CWP1KO2 Nsi for      | GC ATGCAT <u>ATAACTTCGTATAATGTGTA</u> CTACTATACGAAGTTAT<br>GTTTCATGCCAAAAACGGGAAAAA                                                   | cloning of fragment RS2' for construct CWP1KO2 (lox5171 site is underlined)                                                          |
| 1877                   | CWP1KO2 Pac rev      | CG TTAATTA AC CAA TAG TGC ATA TGT TTT GTT AAG A                                                                                       | cloning of fragment RS2' for construct CWP1KO2                                                                                       |
| 1884                   | 180BPupstrRS1for     | CAGACTAGAATGCCCGAACA                                                                                                                  | amplification from 180bp upstream of region RS1                                                                                      |
| 1885                   | 180BPdnstrRS1' rev   | ATA AAG ATG GTT CTA TAG TTA GCA G                                                                                                     | amplification from 180bp downstream of region RS1'                                                                                   |
| 1886                   | CWP1KO3SbfSwaf or    | GCC CTG CAG GAT TTA AAT GTC TTC CTC ATC ATA CGT CAT TAC C                                                                             | cloning of fragment RS3 for construct CWP1KO3                                                                                        |
| 1887                   | CWP1KO3Sph rev       | CGG CAT GCG GTG TAG TGC CTT GTA TTC CAG TAT<br>GCG CAT GCA TAA CTT CGT ATA AAG TAT CCT ATA CGA AGT TAT GAA GCG CTG<br>ACC ACA AAT AAC | cloning of fragment RS3 for construct CWP1KO3                                                                                        |
| 1888                   | CWP1KO3Sph for       | CGG CAT GCG GTG TAG TGC CTT GTA TTC CAG TAT<br>GCG CAT GCA TAA CTT CGT ATA AAG TAT CCT ATA CGA AGT TAT GAA GCG CTG<br>ACC ACA AAT AAC | cloning of "floxed" <i>PAC</i> cassette for construct CWP1KO3 (lox2272 <sub>a</sub> site is underlined)                              |
| 1889                   | CWP1KO3Spe rev       | CGA CTA GTG AAT TCG AGC TCG GTA CCA G                                                                                                 | cloning of "floxed" <i>PAC</i> cassette for construct CWP1KO3                                                                        |
| 1890                   | CWP1KO3Spe for       | GCA CTA GTA TAA CTT CGT ATA AAG TAT CCT ATA CGA AGT TAT GCA TGT AGA<br>AGT CCA GAA AAT CCG                                            | cloning of fragment RS3' for construct CWP1KO3 (lox2272 <sub>a</sub> site is underlined)                                             |

|      |                        |                                                                                                                     |                                                                                                              |
|------|------------------------|---------------------------------------------------------------------------------------------------------------------|--------------------------------------------------------------------------------------------------------------|
| 1891 | CWP1KO3SwaPac rev      | CGT TAA TTA AAT TTA AAT TGG TGG ATG ACT TTC CAC CGT TTA                                                             | cloning of fragment RS3' for construct CWP1KO3                                                               |
| 1970 | NEO1_seq_as            | TCT TGA GTA GCC ACC AGT CC                                                                                          | amplification of <i>cwp1-4</i> from genomic DNA                                                              |
| 2260 | Nsi-NLS_Ala-NLS_Cas9_s | GC ATGCAT CCAAGAAAAACGCAAGGTGGCTCCTAAGAAAAAGCGAAAGTGGAC<br>AAG AAG TAC AGC ATC GGC CTG G                            | cloning of <i>S. pyogenes</i> Cas9 with the insertion of a <i>Giardia</i> tandem nuclear localization signal |
| 2261 | Cas9_BglII_as          | CG AGATCT CTTGCAGATAGCAGATCCGG                                                                                      | cloning of <i>S. pyogenes</i> Cas9                                                                           |
| 2262 | BsaBI_Cas9_s           | GC GATCAC CATCATGGAAAGAAGCAGCTTC                                                                                    | cloning of <i>S. pyogenes</i> Cas9                                                                           |
| 2263 | Cas9_STOP_Pac_as       | CG TTAATTAA TCA GGC ATA ATC GGG CAC GTC ATA GGG ATA                                                                 | cloning of <i>S. pyogenes</i> Cas9                                                                           |
| 2310 | cas9short_HA_stop_pac  | CG TTAATTAA TCA CGCGTAGTCTGGGACATCGTATGGGTA<br>GTCAGGGGGGCCTTGGTGA                                                  | cloning of a truncated 1044bp variant of <i>S. pyogenes</i> Cas9                                             |
| 2407 | Sbf_Pac_RS4N_for       | GC CCTGCAGG TTAATTAA GCACGGGCTTGCTGACGA                                                                             | cloning of fragment RS4N for construct CWP1 KO4                                                              |
| 2408 | Nsi_RS4N_rev           | CG ATGCAT GTACCTGTAAGGCCCATGTC                                                                                      | cloning of fragment RS4N for construct CWP1 KO4                                                              |
| 2412 | Sbf_RS4N'_for          | GC CCTGCAGG CCA TCC CAG AGG GTC TGT G                                                                               | cloning of fragment RS4N' for construct CWP1 KO4                                                             |
| 2413 | Sbf_Pac_RS4N'_rev      | GC CCTGCAGG TTAATTAA AGG GGT CTT TTA GAA TTG ATG CGT                                                                | cloning of fragment RS4N' for construct CWP1 KO4                                                             |
| 2414 | CWP1KO1chk_for         | GC ATGCAT GCA AGA CAC TCG ACA AGA G                                                                                 | amplification of allele <i>cwp1-1</i> from genomic DNA                                                       |
| 2415 | CWP1KO1chk_rev         | CG TTAATTAA TGC ATG AAG ATC AGT GCT AG                                                                              | amplification of allele <i>cwp1-1</i> from genomic DNA                                                       |
| 2416 | CWP1KO2chk_for         | GC ATGCAT ATGGACACAGAATGCACGAAG                                                                                     | amplification of allele <i>cwp1-2</i> from genomic DNA                                                       |
| 2417 | CWP1KO2chk_rev         | CG TTAATTAA TCG TAC TCT CAG TAA CCT GTA C                                                                           | amplification of allele <i>cwp1-2</i> from genomic DNA                                                       |
| 2418 | CWP1KO3chk_for         | GC CCTGCAGG ATGGCCCAACAGCTTATAAG                                                                                    | amplification of allele <i>cwp1-3</i> from genomic DNA                                                       |
| 2419 | CWP1KO3chk_rev         | CG TTAATTAA ATA ATC GTT TTC TCT GCG TTG<br>CG TTAATTAA CTA <u>CGCGTAGTCTGGGACATCGTATGGGTA</u><br>ATCGCCATCTTCCAGCAG | amplification of allele <i>cwp1-3</i> from genomic DNA                                                       |
| 2426 | Cre-HA-Pac-as          | CG TTAATTAA CTA <u>CGCGTAGTCTGGGACATCGTATGGGTA</u><br>ATCGCCATCTTCCAGCAG                                            | cloning of recombinant HA-tagged Cre recombinase (HA tag coding sequence is underlined)                      |
| 2432 | Hind_CWP1_s            | GC AAGCTT CTAGCCACGCATGGGCTGT                                                                                       | cloning of the <i>CWP1</i> locus in pBluescript for complementation test                                     |
| 2433 | CWP1_Spe_as            | CG ACTAGT TCTTGAGTAGCCACCAGTCC                                                                                      | cloning of the <i>CWP1</i> locus in pBluescript for complementation test                                     |
| 2434 | Not_CWP1p_LS_s         | GC GCGCCGC CTAGCCACGCATGGGCTGT                                                                                      | cloning of a recombinant <i>CWP2</i> locus in pBluescript for complementation test                           |
| 2435 | EcoRV_HA_CWP2_as       | CG GATATC TCTTGAGTAGCCACCAGTCC                                                                                      | cloning of a recombinant <i>CWP2</i> locus in pBluescript for complementation test                           |
| 2479 | CWP2_961bp_fw          | GGC AAT GCT AGC CGC TCT G                                                                                           | 3' RACE: amplification step for <i>cwp2</i>                                                                  |
